# Supplementary material
Source: PubMed Central journal article supplement (PMC3111007)
Supplement: supp_1947601911405043_10.1177_1947601911405043_FigS2.pdf [file supp_1947601911405043_10.1177_1947601911405043_FigS2.pdf]

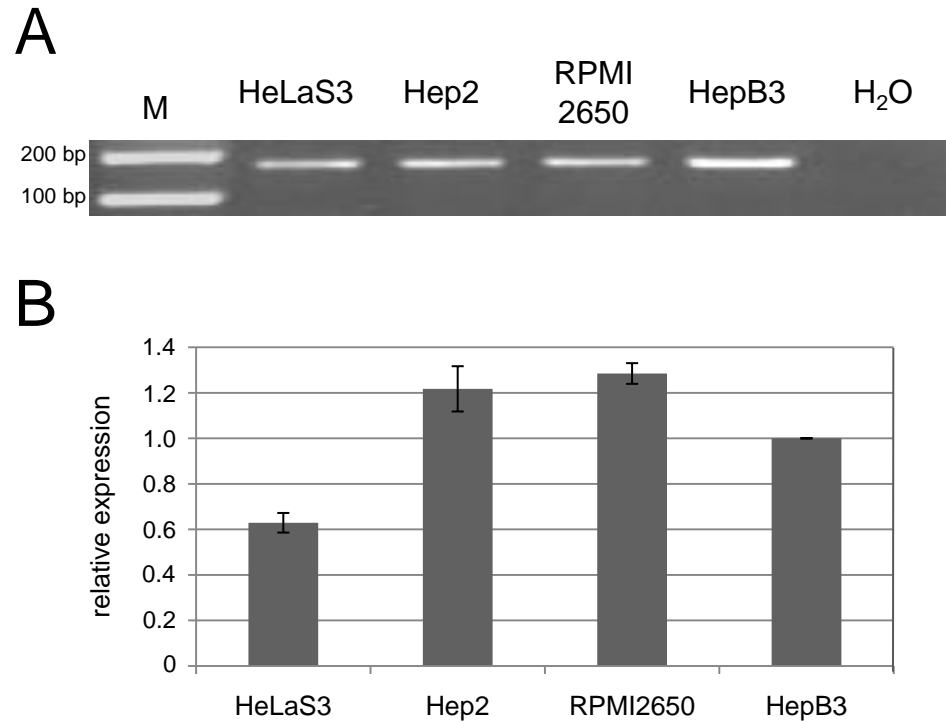

**Supplementary Figure S2.** *HIF1A* (A) and *EPOR* (B) expression in cancer cell lines. RNA was isolated from different cancer cell lines and reverse transcribed. **A** Expression of *HIF1A* in cancer cell lines. Products were resolved on 2% gels together with and a 100 bp ladder (M). **B.** *EPOR* expression was determined by real-time, normalized to *GAPDH* and blotted relative to HepB3 (=1).
